# Supplementary material for: Pre-Stroke Loop Diuretics and Anemia in Elderly Patients Are Associated Factors of Severe Renal Dysfunction at the Time of Acute Stroke Onset
Source: MDPI journal article supplement (doi:10.3390/jcdd10090405), 2023-09-19
Supplement: s1 [file s1]

## Supplementary File

**Table S1** Pre-stroke medications of males and females

| Variables                               | Male Sex    | Female Sex  |
|-----------------------------------------|-------------|-------------|
|                                         | n=1905      | n=1567      |
| DPP4is, n (%)                           | 235 (12.3%) | 129 (8.2%)  |
| Biguanide, n (%)                        | 121 (6.4%)  | 57 (3.6%)   |
| Alpha-GIs, n (%)                        | 59 (3.1%)   | 26 (1.7%)   |
| Insulin secretagogues, n (%)            | 125 (6.6%)  | 65 (4.1%)   |
| Long-acting insulin analog, n (%)       | 51 (2.7%)   | 25 (1.6%)   |
| SGLT2is, n (%)                          | 14 (0.7%)   | 5 (0.3%)    |
| Loop diuretics, n (%)                   | 150 (7.9%)  | 168 (10.7%) |
| Thiazide diuretics, n (%)               | 40 (2.1%)   | 34 (2.2%)   |
| MRAs, n (%)                             | 85 (4.5%)   | 107 (6.8%)  |
| ARBs, n (%)                             | 447 (23.6%) | 381 (24.4%) |
| L-type CCBs, n (%)                      | 432 (22.7%) | 350 (22.3%) |
| N-type or T-type CCBs, n (%)            | 80 (4.2%)   | 74 (4.7%)   |
| Verapamil, n (%)                        | 24 (1.3%)   | 34 (2.2%)   |
| Diltiazem, n (%)                        | 19 (1.0%)   | 16 (1.0%)   |
| ACEis, n (%)                            | 136 (7.1%)  | 84 (5.4%)   |
| Alpha-blockers, n (%)                   | 35 (1.8%)   | 25 (1.6%)   |
| Alpha-beta blockers, n (%)              | 165 (8.7%)  | 111 (7.1%)  |
| beta-blockers, n (%)                    | 115 (6.0%)  | 111 (7.1%)  |
| Statin, n (%)                           | 417 (21.9%) | 332 (21.2%) |
| Warfarin, n (%)                         | 129 (6.8%)  | 108 (6.9%)  |
| DOACs, n (%)                            | 104 (5.5%)  | 73 (4.7%)   |
| Aspirin, n (%)                          | 353 (18.5%) | 212 (13.5%) |
| Antiplatelets other than aspirin, n (%) | 244 (12.8%) | 131 (8.4%)  |

Alpha GIs, alpha glucosidase inhibitors; ARBs, angiotensin receptor blockers; ACEis, angiotensin-converting enzyme inhibitors; AS, acute stroke; CCBs, calcium channel blockers; DOACs, direct-acting oral anticoagulants; DPP4is, dipeptidyl peptidase 4 inhibitors; MRAs, mineralocorticoid receptor antagonists; P, probability; SGLT2i, sodium-glucose co-transporter 2 inhibitors

**Table S2** Association of pre-stroke variables with renal dysfunction in male patients

| Variables                               | Ccr <30 mL/min<br>n=185 | Ccr ≥30 mL/min<br>n=1720 | P-value |
|-----------------------------------------|-------------------------|--------------------------|---------|
| mRS before the acute stroke             | 1, 0–3                  | 0, 0–1                   | <0.0001 |
| Albumin, g/L                            | 37, 33–40               | 41, 38–43                | <0.0001 |
| Hemoglobin, g/L                         | 119, 107–128            | 142, 131–153             | <0.0001 |
| Glucose, mmol/L                         | 7.05, 5.77–9.41         | 6.88, 5.83–8.62          | 0.2557  |
| Glycated hemoglobin A1c, %              | 5.8, 5.4–6.45           | 5.9, 5.5–6.4             | 0.1243  |
| LDL-C, mmol/L                           | 2.42, 1.96–3.02         | 2.83, 2.27–3.43          | <0.0001 |
| HDL-C, mmol/L                           | 1.28, 1.02–1.54         | 1.36, 1.12–1.66          | 0.0019  |
| Triglyceride, mmol/L                    | 1.00, 0.72–1.42         | 1.13, 0.79–1.80          | 0.0028  |
| C-reactive protein, µg/L                | 3400, 1000–15500        | 1100, 500–3300           | <0.0001 |
| DPP4is, n (%)                           | 34 (18.38%)             | 201 (11.69%)             | 0.0126  |
| Biguanide, n (%)                        | 19 (10.27%)             | 102 (5.93%)              | 0.0321  |
| Alpha GIs, n (%)                        | 13 (7.03%)              | 46 (2.67%)               | 0.0043  |
| Insulin secretagogues, n (%)            | 9 (4.86%)               | 116 (6.74%)              | 0.3074  |
| Long-acting insulin analog, n (%)       | 8 (4.32%)               | 43 (2.50%)               | 0.1748  |
| SGLT2is, n (%)                          | 1 (0.54%)               | 13 (0.76%)               | 1.0000  |
| Loop diuretics, n (%)                   | 55 (29.73%)             | 95 (5.52%)               | <0.0001 |
| Thiazide diuretics, n (%)               | 6 (3.24%)               | 34 (1.98%)               | 0.2856  |
| MRAs, n (%)                             | 12 (6.49%)              | 73 (4.24%)               | 0.1843  |
| ARBs, n (%)                             | 60 (32.43%)             | 387 (22.5%)              | 0.0034  |
| L-type CCBs, n (%)                      | 66 (35.68%)             | 366 (21.28%)             | <0.0001 |
| N-type or T-type CCBs, n (%)            | 10 (5.41%)              | 70 (4.07%)               | 0.4069  |
| Verapamil, n (%)                        | 7 (3.78%)               | 17 (0.99%)               | 0.0070  |
| Diltiazem, n (%)                        | 2 (1.08%)               | 17 (0.99%)               | 0.7064  |
| ACEis, n (%)                            | 9 (4.86%)               | 127 (7.36%)              | 0.1838  |
| Alpha-blockers, n (%)                   | 12 (6.49%)              | 23 (1.34%)               | <0.0001 |
| Alpha-beta blockers, n (%)              | 39 (21.08%)             | 126 (7.33%)              | <0.0001 |
| Beta-blockers, n (%)                    | 21 (11.35%)             | 94 (5.47%)               | 0.0037  |
| Statin, n (%)                           | 44 (23.78%)             | 373 (21.69%)             | 0.5158  |
| Warfarin, n (%)                         | 22 (11.89%)             | 107 (6.22%)              | 0.0072  |
| DOACs, n (%)                            | 5 (2.7%)                | 99 (5.76%)               | 0.0576  |
| Aspirin, n (%)                          | 66(35.68%)              | 287 (16.69%)             | <0.0001 |
| Antiplatelets other than aspirin, n (%) | 34 (18.38%)             | 210 (12.21%)             | 0.0229  |

All values except for categorical data are represented as median and interquartile ranges.

Alpha GIs, alpha glucosidase inhibitors; ACEis, angiotensin-converting enzyme inhibitors; ARBs, angiotensin receptor blockers; AS, acute stroke; CCBs, calcium channel blockers; Ccr, creatinine clearance; DOACs, direct-acting oral anticoagulants; DPP4is, dipeptidyl peptidase 4 inhibitors; HDL-C, high-density lipoprotein cholesterol; LDL-C, low-density lipoprotein cholesterol; MRAs, mineralocorticoid receptor antagonists; mRS, modified Rankin Scale; n, number; P, probability; SGLT2i, sodium-glucose co-transporter 2 inhibitors

**Table S3** Association of pre-stroke variables with severe renal dysfunction in female patients

| Variables                               | Ccr <30 mL/min<br>n=293 | Ccr ≥30 mL/min<br>n=1274 | P-value |
|-----------------------------------------|-------------------------|--------------------------|---------|
| mRS before the acute stroke             | 3, 0–4                  | 0, 0–3                   | <0.0001 |
| Albumin, g/L                            | 37, 33–40               | 40, 37–43                | <0.0001 |
| Hemoglobin, g/L                         | 117, 109–128            | 132, 121–140             | <0.0001 |
| Glucose, mmol/L                         | 6.55, 5.61–8.05         | 6.66, 5.83–8.33          | 0.0607  |
| Glycated hemoglobin A1c, %              | 5.7, 5.4–6.1            | 5.8, 5.5–6.2             | 0.0130  |
| LDL-C, mmol/L                           | 2.89, 2.22–3.64         | 3.24, 2.66–3.94          | <0.0001 |
| HDL-C, mmol/L                           | 1.46, 1.16–1.83         | 1.58, 1.31–1.92          | 0.0001  |
| Triglyceride, mmol/L                    | 1.02, 0.77–1.39         | 1.05, 0.77–1.50          | 0.2262  |
| C-reactive protein, µg/L                | 2200, 600–7850          | 1100, 400–4000           | <0.0001 |
| DPP4is, n (%)                           | 22 (7.51%)              | 107 (8.40%)              | 0.6134  |
| Biguanide, n (%)                        | 9 (3.07%)               | 48 (3.77%)               | 0.5581  |
| Alpha GIs, n (%)                        | 4 (1.37%)               | 22 (1.73%)               | 0.6544  |
| Insulin secretagogues, n (%)            | 14 (4.78%)              | 51 (4.00%)               | 0.5556  |
| Long-acting insulin analog, n (%)       | 7 (2.39%)               | 18 (1.41%)               | 0.2539  |
| SGLT2is, n (%)                          | 0 (0%)                  | 5 (0.39%)                | 0.5908  |
| Loop diuretics, n (%)                   | 83 (28.3%)              | 85 (6.67%)               | <0.0001 |
| Thiazide diuretics, n (%)               | 9 (3.07%)               | 25 (1.96%)               | 0.2611  |
| MRAs, n (%)                             | 49 (16.7%)              | 58 (4.6%)                | <0.0001 |
| ARBs, n (%)                             | 88 (30.03%)             | 293 (23.0%)              | 0.0129  |
| L-type CCBs, n (%)                      | 76 (25.94%)             | 274 (21.51%)             | 0.1052  |
| N-type or T-type CCBs, n (%)            | 14 (4.78%)              | 60 (4.71%)               | 0.9603  |
| Verapamil, n (%)                        | 8 (2.73%)               | 26 (2.04%)               | 0.4781  |
| Diltiazem, n (%)                        | 4 (1.37%)               | 12 (0.94%)               | 0.5188  |
| ACEis, n (%)                            | 21 (7.17%)              | 63 (4.95%)               | 0.1418  |
| Alpha-blockers, n (%)                   | 8 (2.73%)               | 17 (1.33%)               | 0.1089  |
| Alpha-beta blockers, n (%)              | 39 (13.31%)             | 72 (5.65%)               | <0.0001 |
| Beta-blockers, n (%)                    | 32 (10.92%)             | 79 (6.20%)               | 0.0071  |
| Statin, n (%)                           | 66 (22.53%)             | 266 (20.88%)             | 0.5364  |
| Warfarin, n (%)                         | 39 (13.31%)             | 69 (5.42%)               | <0.0001 |
| DOACs, n (%)                            | 6 (2.05%)               | 67 (5.26%)               | 0.0100  |
| Aspirin, n (%)                          | 58 (19.8%)              | 154 (12.09%)             | 0.0009  |
| Antiplatelets other than aspirin, n (%) | 32 (10.92%)             | 99 (7.77%)               | 0.0887  |

All values except for categorical data are represented as median and interquartile ranges.

Alpha GIs, alpha glucosidase inhibitors; ACEis, angiotensin-converting enzyme inhibitors; ARBs, angiotensin receptor blockers; AS, acute stroke; CCBs, calcium channel blockers; Ccr, creatinine clearance; DOACs, direct-acting oral anticoagulants; DPP4is, dipeptidyl peptidase 4 inhibitors; HDL-C, high-density lipoprotein cholesterol; LDL-C, low-density lipoprotein cholesterol; MRAs, mineralocorticoid receptor antagonists; mRS, modified Rankin Scale; n, number; P, probability; SGLT2i, sodium-glucose co-transporter 2 inhibitors

**Table S4** The cut-off value of hemoglobin for predicting Ccr <30 mL/min in male patients using receiver operating characteristics curve of logistic regression analysis

| Variable                                | Sensitivity | Specificity | AUC   |
|-----------------------------------------|-------------|-------------|-------|
| Hemoglobin ( $\leq 130$ vs $>130$ ) g/L | 82.5%       | 76.7%       | 0.853 |

AUC, area under the curve; Ccr, creatinine clearance

**Figure S1** Receiver operating characteristics curve of hemoglobin for predicting Ccr <30 mL/min in male patients. Area under the curve is 0.853.

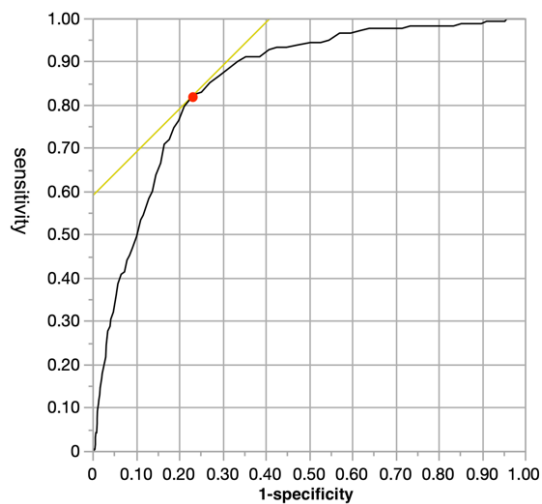

**Table S5** The cut-off value of albumin for predicting Ccr <30 mL/min in male patients using receiver operating characteristics curve of logistic regression analysis

| Variable                           | Sensitivity | Specificity | AUC   |
|------------------------------------|-------------|-------------|-------|
| Albumin ( $\leq 38$ vs $>38$ ) g/L | 67.6%       | 69.2%       | 0.735 |

AUC, area under the curve; Ccr, creatinine clearance

**Figure S2** Receiver operating characteristics curve of albumin for predicting Ccr <30 mL/min in male patients. Area under the curve is 0.735.

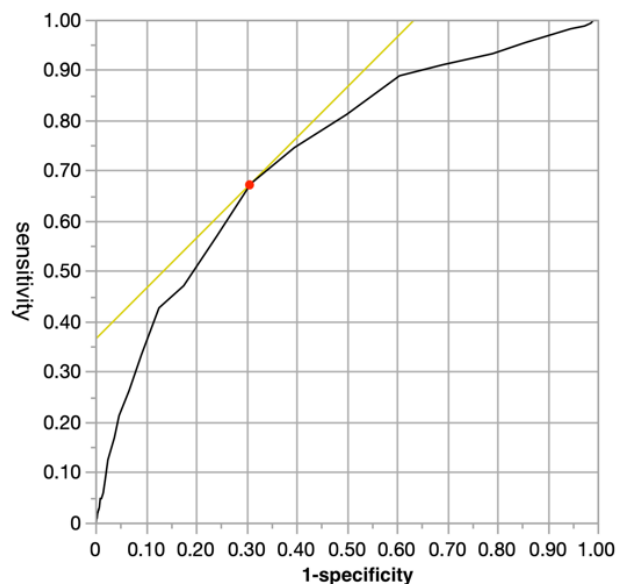

**Table S6** The cut-off value of hemoglobin for predicting Ccr <30 mL/min in female patients using receiver operating characteristics curve of logistic regression analysis

| Variable                                | Sensitivity | Specificity | AUC   |
|-----------------------------------------|-------------|-------------|-------|
| Hemoglobin ( $\leq 124$ vs $>124$ ) g/L | 66.7%       | 67.5%       | 0.727 |

AUC, area under the curve; Ccr, creatinine clearance

**Figure S3** Receiver operating characteristics curve of hemoglobin for predicting Ccr <30 mL/min in female patients. Area under the curve is 0.7

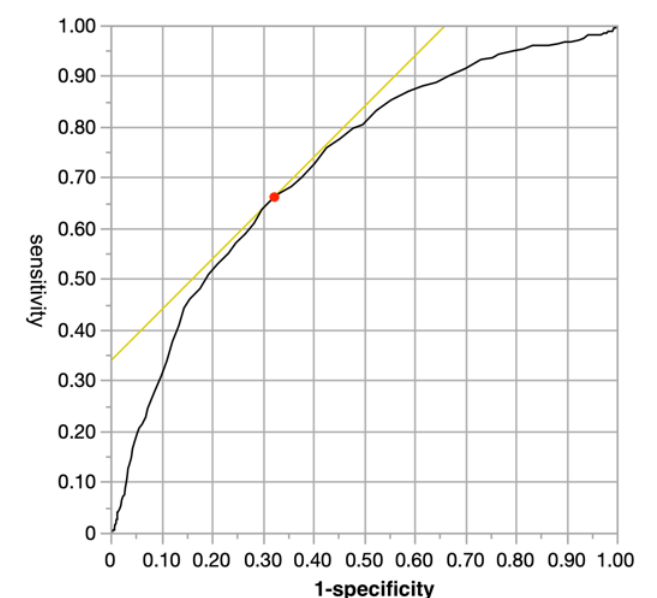

**Table S7** Association of loop diuretic use with other heart-disease relevant medications in male patients: the contingency table analysis

| Variables           |             |              | P-value |
|---------------------|-------------|--------------|---------|
| Aspirin             |             |              | <0.0001 |
| Loop diuretics      | Use         | No use       |         |
| Use, n (%)          | 55 (36.7%)  | 95 (63.3%)   |         |
| No use, n (%)       | 298 (17.0%) | 1457 (83.0%) |         |
| MRAs                |             |              | <0.0001 |
| loop diuretics      | Use         | No use       |         |
| Use, n (%)          | 102 (68.0%) | 48 (32.0%)   |         |
| No use, n (%)       | 37 (2.11%)  | 1718 (97.9%) |         |
| L-type CCB          |             |              | 0.0752  |
| Loop diuretics      | Use         | No use       |         |
| Use, n (%)          | 43 (28.7%)  | 107 (71.3%)  |         |
| No use, n (%)       | 389 (22.2%) | 1366 (77.8%) |         |
| Alpha blockers      |             |              | 0.4574  |
| loop diuretics      | Use         | No use       |         |
| Use, n (%)          | 4 (2.67%)   | 146 (97.3%)  |         |
| No use, n (%)       | 31 (1.77%)  | 1724 (98.2%) |         |
| Alpha-beta blockers |             |              | <0.0001 |
| Loop diuretics      | Use         | No use       |         |
| Use, n (%)          | 45 (30.0%)  | 105 (70.0%)  |         |
| No use, n (%)       | 120 (6.8%)  | 1635 (93.2%) |         |
| Beta blockers       |             |              | <0.0001 |
| Loop diuretics      | Use         | No use       |         |
| Use, n (%)          | 25 (16.7%)  | 125 (83.3%)  |         |
| No use, n (%)       | 90 (5.1%)   | 1665 (94.9%) |         |
| ARBs                |             |              | 0.0001  |
| Loop diuretics      | Use         | No use       |         |
| Use, n (%)          | 55 (36.7%)  | 95 (63.3%)   |         |
| No use, n (%)       | 392 (22.3%) | 1363 (77.7%) |         |
| ACEi                |             |              | 0.0052  |
| Loop diuretics      | Use         | No use       |         |
| Use, n (%)          | 20 (13.3%)  | 130 (86.7%)  |         |
| No use, n (%)       | 116 (6.6%)  | 1639 (93.4%) |         |
| DOACs               |             |              | 0.0084  |
| Loop diuretics      | Use         | No use       |         |
| Use, n (%)          | 16 (10.7%)  | 134 (89.3%)  |         |
| No use, n (%)       | 88 (5.0%)   | 1667 (95.0%) |         |
| Warfarin            |             |              | <0.0001 |
| Loop diuretics      | Use         | No use       |         |
| Use, n (%)          | 32 (21.3%)  | 118 (78.7%)  |         |
| No use, n (%)       | 97 (5.5%)   | 1658 (94.5%) |         |

ACEis, angiotensin-converting enzyme inhibitors; ARBs, angiotensin receptor blockers; CCBs, calcium channel blockers; DOACs, direct-acting oral anticoagulants; MRAs, mineralocorticoid receptor antagonists; P, probability

**Table S8** Association of triple-whammy with renal function in male patients

| Variables              | Ccr <30 mL/min | Ccr ≥30 mL/min | P-value |
|------------------------|----------------|----------------|---------|
| Triple whammy_ARB      |                |                | <0.0001 |
| Yes, n (%)             | 13 (52%)       | 12 (48%)       |         |
| No, n (%)              | 172 (9.1%)     | 1708 (90.9%)   |         |
| Triple whammy_ACE      |                |                | 0.3278  |
| Yes, n (%)             | 2 (16.7%)      | 10 (83.3%)     |         |
| No, n (%)              | 183 (9.7%)     | 1710 (90.3%)   |         |
| Triple whammy_thiazide |                |                | 1.0000  |
| Yes, n (%)             | 0 (0%)         | 4 (100%)       |         |
| No, n (%)              | 185 (9.7%)     | 1716 (90.3%)   |         |

ACEis, angiotensin-converting enzyme inhibitors; ARBs, angiotensin receptor blockers; Ccr, creatinine clearance; P, probability; Triple whammy\_ARB, ARBs + aspirin + loop diuretics; Triple whammy\_ACE, ACEi + aspirin + loop diuretics; triple whammy\_thiazide, (ACEi or ARB) + asoirin + thiazide diuretics

**Table S9** Association of loop diuretic use with other heart-disease relevant medications in female patients: the contingency table analysis

| variables           |             |              | P-value |
|---------------------|-------------|--------------|---------|
| Aspirin             |             |              | <0.0001 |
| Loop diuretics      | Use         | No use       |         |
| Use, n (%)          | 47 (28.0%)  | 121 (72.0%)  |         |
| No use, n (%)       | 165 (11.8%) | 1235 (88.2%) |         |
| MRAs                |             |              | <0.0001 |
| Loop diuretics      | Use         | No use       |         |
| Use, n (%)          | 60 (36.7%)  | 108 (64.3%)  |         |
| No use, n (%)       | 46 (3.3%)   | 1354 (96.7%) |         |
| L-type CCB          |             |              | 0.7641  |
| Loop diuretics      | Use         | No use       |         |
| Use, n (%)          | 36 (21.4%)  | 132 (78.6%)  |         |
| No use, n (%)       | 314 (22.4%) | 1086 (77.6%) |         |
| Alpha-beta blockers |             |              | <0.0001 |
| Loop diuretics      | Use         | No use       |         |
| Use, n (%)          | 39 (23.2%)  | 129 (76.8%)  |         |
| No use, n (%)       | 73 (5.2%)   | 1327 (94.8%) |         |
| Beta blockers       |             |              | <0.0001 |
| Loop diuretics      | Use         | No use       |         |
| Use, n (%)          | 28 (16.7%)  | 140 (83.3%)  |         |
| No use, n (%)       | 83 (5.9%)   | 1317 (94.1%) |         |
| ARBs                |             |              | 0.0382  |
| Loop diuretics      | Use         | No use       |         |
| Use, n (%)          | 52 (31.0%)  | 116 (69.0%)  |         |
| No use, n (%)       | 329 (23.5%) | 1071 (76.5%) |         |
| ACEi                |             |              | 0.4822  |
| Loop diuretics      | Use         | No use       |         |
| Use, n (%)          | 11 (6.6%)   | 157 (93.4%)  |         |
| No use, n (%)       | 73 (5.2%)   | 1327 (94.8%) |         |
| DOACs               |             |              | 0.0045  |
| Loop diuretics      | Use         | No use       |         |
| Use, n (%)          | 16 (9.5%)   | 152 (90.5%)  |         |
| No use, n (%)       | 57 (4.1%)   | 1343 (95.9%) |         |
| Warfarin            |             |              | <0.0001 |
| Loop diuretics      | Use         | No use       |         |
| Use, n (%)          | 37 (22.0%)  | 131 (78.0%)  |         |
| No use, n (%)       | 72 (5.1%)   | 1328 (94.9%) |         |

ACEis, angiotensin-converting enzyme inhibitors; ARBs, angiotensin receptor blockers; CCBs, calcium channel blockers; DOACs, direct-acting oral anticoagulants; MRAs, mineralocorticoid receptor antagonists; P, probability



**Table S10** Association of triple-whammy with renal function in female patients

| variables              | Ccr <30 mL/min | Ccr ≥30 mL/min | P-value |
|------------------------|----------------|----------------|---------|
| Triple whammy_ARB      |                |                | 0.0025  |
| Yes, n (%)             | 8 (53.3%)      | 7 (46.7%)      |         |
| No, n (%)              | 285 (18.4%)    | 1267 (81.6%)   |         |
| Triple whammy_ACE      |                |                | 0.4628  |
| Yes, n (%)             | 1 (33.3%)      | 2 (66.7%)      |         |
| No, n (%)              | 292 (18.7%)    | 1272 (81.3%)   |         |
| Triple whammy_thiazide |                |                | 1.0000  |
| Yes, n (%)             | 0 (0%)         | 3 (100%)       |         |
| No, n (%)              | 293 (18.7%)    | 1271 (81.3%)   |         |

ACEis, angiotensin-converting enzyme inhibitors; ARBs, angiotensin receptor blockers; Ccr, creatinine clearance; P, probability; Triple whammy\_ARB, ARBs + aspirin + loop diuretics; Triple whammy\_ACE, ACEi + aspirin + loop diuretics; triple whammy\_thiazide, (ACEi or ARB) + asoirin + thiazide diuretics
